# Supplementary material for: High speed rail and coastal tourism: Identifying passenger profiles and travel behaviour
Source: PLoS One. 2017 Jun 23;12(6):e0179682. doi: 10.1371/journal.pone.0179682 (PMC5482456; doi:10.1371/journal.pone.0179682)
Supplement: S3 File — (XLSX) [file pone.0179682.s003.xlsx]

## Sheet: Hoja1
TOURIST	SEX	AGE	EDUC_1	EDUC_2	GROUP	FAMILY	DESTINATION	DEPARTURE	ACCOMMODATION	STAY
1	1	0	1	1	1	0	0	0	0	1
1	1	1	1	1	1	0	1	0	0	1
1	0	1	0	0	1	0	0	0	0	1
1	0	1	1	1	1	0	0	0	0	1
1	0	0	1	1	1	0	1	0	0	1
1	0	0	1	1	0	1	0	1	0	1
1	1	0	1	0	1	0	0	1	0	1
1	0	0	1	1	1	0	0	1	0	1
1	1	0	1	1	1	0	0	1	0	1
1	0	0	1	1	1	0	0	0	0	1
1	0	0	1	1	1	0	0	0	0	1
0	0	1	1	0	0	1	1	0	1	1
1	0	1	1	1	1	1	1	0	1	1
1	1	0	1	0	1	0	0	0	1	1
1	1	0	1	1	1	0	1	1	1	1
1	1	0	0	0	1	0	0	1	1	1
1	0	0	1	1	1	0	1	0	0	1
0	1	1	1	1	1	1	0	0	0	1
1	0	0	1	1	0	1	0	0	0	1
1	0	0	1	1	1	0	0	0	0	1
1	0	1	1	1	1	1	0	0	0	1
1	1	0	0	0	1	1	1	0	0	1
1	0	0	1	1	1	0	1	0	0	1
1	0	0	1	0	1	0	0	0	0	1
1	1	1	1	1	1	0	0	0	0	1
1	0	1	1	1	0	0	0	0	0	1
1	1	0	1	0	1	0	0	0	1	1
1	1	0	1	1	1	0	0	0	0	1
1	1	0	0	0	1	0	0	0	0	1
1	0	0	1	0	1	0	0	0	0	1
1	0	0	1	1	1	0	0	0	0	1
1	1	0	1	0	0	1	0	1	0	1
1	1	0	1	0	0	1	0	1	0	1
1	0	0	1	1	1	1	0	1	0	1
1	1	1	1	1	1	1	0	1	0	1
1	1	0	1	1	1	0	0	1	0	1
1	1	0	1	1	1	0	0	1	0	1
1	0	0	1	1	1	0	0	1	0	1
1	1	0	1	1	1	0	0	1	0	1
1	0	0	1	1	1	0	0	1	0	1
1	0	0	1	1	1	0	0	1	0	1
1	1	0	1	1	1	0	0	1	0	1
1	1	0	1	1	1	0	0	1	0	1
1	1	0	1	1	1	0	0	1	0	1
1	0	0	1	1	1	0	0	1	0	1
1	1	0	0	0	1	0	0	1	0	1
1	1	0	1	1	1	0	1	0	0	1
1	0	0	1	1	1	0	0	0	0	1
1	1	0	1	0	1	0	0	0	0	1
1	1	0	1	1	1	0	0	0	0	1
1	0	0	1	1	1	0	0	0	0	1
1	0	0	1	1	1	0	0	0	0	1
1	1	0	1	1	1	0	0	0	0	1
1	1	0	1	1	1	0	0	0	0	1
1	0	0	1	0	1	0	1	0	0	1
1	1	0	1	1	1	0	1	0	1	1
1	0	0	1	1	1	0	0	0	1	1
1	0	0	1	1	1	0	0	0	1	1
1	0	0	1	1	1	0	0	1	1	1
1	1	0	1	0	1	0	0	1	1	1
1	0	0	1	1	1	0	0	1	1	1
1	1	0	1	1	0	0	1	0	1	1
1	0	0	1	1	1	0	0	0	1	1
1	0	0	1	1	1	0	1	0	1	1
1	0	0	1	1	1	0	0	0	0	1
1	1	0	1	1	1	0	0	0	0	1
1	0	0	1	1	1	0	0	0	0	1
1	1	0	1	0	1	0	0	1	0	1
1	0	0	1	1	1	0	0	0	0	1
1	0	0	1	1	1	0	1	0	0	1
1	1	0	1	1	1	0	0	0	0	1
1	1	0	0	0	1	0	0	0	0	1
1	1	0	1	1	1	0	0	0	0	1
1	0	0	1	1	1	0	0	0	0	1
1	0	0	1	1	1	0	0	0	0	1
1	0	0	1	1	1	0	0	0	0	1
1	0	0	1	1	1	0	0	0	0	1
1	0	0	1	0	1	0	0	1	0	1
1	0	0	1	1	1	0	0	1	0	1
1	0	0	1	1	1	0	0	1	0	1
1	0	0	1	1	1	0	0	1	0	1
1	1	0	1	1	1	0	0	1	0	1
1	0	0	1	1	1	0	0	1	0	1
1	0	0	1	1	1	0	0	1	0	1
1	0	0	1	1	1	0	0	1	0	1
1	0	0	0	0	1	0	0	1	0	1
1	0	0	1	0	1	0	0	0	0	1
1	0	0	1	1	1	0	0	0	0	1
1	0	0	1	1	1	0	1	1	1	1
1	1	0	1	1	1	0	1	1	1	1
1	0	0	1	1	1	0	1	0	1	1
1	0	0	0	0	1	0	0	0	1	1
1	1	0	1	1	1	0	0	0	0	1
1	0	0	0	0	1	0	0	1	0	1
1	0	0	1	1	1	0	0	1	0	1
1	1	0	1	1	1	0	1	0	0	1
1	1	0	1	1	1	0	0	0	0	1
1	0	0	1	1	1	0	0	0	0	1
1	1	0	1	1	1	0	0	0	0	1
1	1	0	1	1	1	0	0	0	0	1
1	0	0	1	1	1	0	0	1	0	1
1	1	0	1	1	1	0	0	1	0	1
1	1	0	1	1	1	0	1	0	0	1
1	0	0	1	1	1	0	0	0	0	1
1	0	0	1	1	1	0	0	0	0	1
1	1	0	1	1	1	0	0	0	1	1
1	0	0	1	1	1	0	0	0	1	1
1	1	0	1	1	1	0	0	1	0	1
1	0	0	1	1	1	0	0	1	0	1
1	1	0	1	1	1	0	0	1	0	1
1	0	0	1	0	1	0	1	0	0	1
1	0	0	1	1	1	0	0	0	0	1
1	0	0	1	1	1	0	0	0	0	1
1	0	0	1	1	1	0	0	0	0	1
1	0	0	1	0	1	0	0	0	0	1
1	1	0	1	1	1	0	0	0	0	1
1	0	0	1	1	1	0	0	1	0	1
1	1	0	1	1	1	0	0	1	0	1
1	1	0	1	1	1	0	0	1	0	1
1	0	0	1	1	1	0	0	1	0	1
1	0	0	1	1	1	0	0	1	0	1
1	0	0	1	0	1	0	1	0	0	1
1	0	0	0	0	1	0	0	0	0	1
1	0	0	0	0	1	0	1	0	0	1
1	1	0	1	0	1	0	0	0	0	1
1	1	0	1	1	1	0	0	0	0	1
1	0	0	1	0	1	0	0	0	0	1
1	0	0	1	1	1	0	0	0	0	1
1	1	1	0	0	1	0	1	1	1	1
1	1	0	1	1	1	0	1	0	0	1
1	0	0	1	0	1	0	1	0	0	1
1	1	0	1	1	1	0	0	1	0	1
1	1	0	1	1	1	0	0	1	0	1
1	1	0	1	1	1	0	0	0	0	1
1	1	0	1	1	1	0	0	0	0	1
1	0	0	1	0	1	0	0	0	0	1
1	0	0	1	0	1	0	0	0	0	1
1	0	1	1	1	1	0	0	0	0	1
1	0	0	1	0	1	0	1	0	0	1
1	1	1	1	0	1	0	0	1	0	1
1	0	0	1	1	1	0	0	1	0	1
1	0	0	1	1	1	0	0	1	0	1
1	0	0	1	0	1	0	1	1	0	1
1	0	0	1	1	1	0	0	0	0	1
1	1	0	1	1	1	0	1	0	0	1
1	0	1	1	1	1	0	1	0	0	1
1	0	1	1	0	1	0	0	0	0	1
1	0	0	1	1	0	0	1	0	1	1
1	0	1	1	1	1	0	1	0	1	1
1	0	0	1	0	1	0	1	0	1	1
1	1	0	1	1	0	0	1	0	1	1
1	0	0	1	0	1	0	1	0	1	1
1	0	1	1	1	1	0	1	0	1	1
0	1	1	0	0	0	1	1	0	1	1
1	0	1	0	0	1	0	0	1	0	1
1	0	1	1	1	1	0	0	1	0	1
1	0	1	1	1	1	0	1	0	0	1
1	0	1	1	0	1	0	0	0	0	1
1	0	0	1	1	1	0	0	0	0	1
1	0	1	1	1	1	0	0	0	0	1
1	0	0	1	1	1	0	0	0	0	1
1	1	0	1	1	1	1	0	0	0	1
1	0	0	1	1	0	1	0	1	0	1
1	0	0	1	0	1	0	0	1	0	1
1	1	0	1	1	1	0	0	1	0	1
1	1	0	1	1	1	0	0	1	0	1
1	1	0	1	1	1	0	0	1	0	1
1	0	0	1	1	1	0	0	1	0	1
1	0	1	1	1	1	0	0	1	0	1
1	1	1	0	0	1	0	0	1	0	1
1	0	1	0	0	1	0	0	1	0	1
1	0	0	1	1	1	1	0	0	0	1
1	1	1	0	0	1	0	0	0	0	1
1	0	0	1	1	1	1	0	0	0	1
1	0	0	1	1	1	0	0	0	0	1
1	1	0	1	1	1	1	0	0	0	1
1	0	0	1	1	1	1	0	0	0	1
1	1	0	1	0	1	0	0	0	0	1
1	1	1	1	1	1	0	0	0	0	1
1	0	0	1	1	1	0	0	0	0	1
1	0	0	1	1	0	1	1	0	0	1
1	0	1	1	0	1	1	0	1	0	1
0	0	1	0	0	1	1	0	0	1	1
0	1	1	0	0	0	1	1	0	1	1
1	1	0	1	1	0	1	1	0	1	1
1	0	0	1	1	1	0	1	1	1	1
1	0	0	1	1	1	0	0	1	1	1
1	0	0	1	1	0	1	1	1	1	1
1	1	1	1	0	0	0	1	1	1	1
1	0	0	1	1	1	0	1	1	1	1
1	0	0	1	1	1	1	1	1	1	1
1	1	0	1	0	0	1	1	0	1	1
1	0	1	1	1	0	1	1	0	1	1
1	0	0	1	1	1	0	0	0	0	1
1	0	1	1	1	1	0	1	1	0	1
1	0	1	1	1	1	0	0	1	0	1
1	1	0	1	1	1	0	0	0	0	1
1	1	1	0	0	1	0	1	0	0	1
1	1	0	1	1	1	0	0	0	0	1
1	0	0	1	1	1	0	0	0	0	1
1	1	0	1	1	1	0	0	1	0	1
1	0	1	1	1	1	0	0	0	0	0
1	1	0	1	1	1	0	0	0	0	0
0	0	1	0	0	1	0	1	0	0	0
1	1	0	1	0	1	0	0	0	0	0
1	1	0	1	1	1	0	0	0	0	0
1	1	1	1	1	1	1	1	0	0	0
1	0	0	1	0	1	0	1	0	0	0
1	0	0	1	1	1	0	0	0	0	0
1	0	1	1	1	1	0	0	1	0	0
1	0	1	1	1	1	0	0	1	0	0
1	1	1	1	1	1	0	0	1	0	0
1	0	1	1	1	1	0	0	0	0	0
1	0	0	1	1	1	0	1	0	0	0
1	1	0	1	1	1	0	0	0	0	0
1	1	0	0	0	1	0	0	0	0	0
0	1	1	0	0	1	1	0	0	0	0
1	1	0	1	1	1	0	0	0	0	0
1	0	0	1	1	1	0	1	0	0	0
1	1	1	1	1	1	0	0	0	0	0
1	1	0	0	0	1	0	0	0	0	0
1	0	0	1	0	1	0	1	0	0	0
1	0	1	1	1	1	0	0	0	0	0
1	0	1	1	0	1	0	0	0	0	0
1	1	0	1	1	1	0	0	0	0	0
1	0	0	0	0	1	0	0	0	0	0
1	0	1	1	1	1	0	1	0	1	0
1	1	0	1	0	1	0	0	0	1	0
0	0	1	0	0	1	1	1	0	1	0
1	0	0	1	1	1	1	0	1	1	0
1	1	1	1	1	1	1	0	1	1	0
1	1	1	1	0	1	1	1	0	1	0
1	1	0	1	0	1	0	0	0	1	0
1	0	1	1	1	1	0	0	1	1	0
1	0	0	1	0	1	0	0	0	1	0
0	0	1	1	1	1	1	1	0	1	0
0	1	1	0	0	0	1	1	1	1	0
1	0	1	1	1	1	0	1	1	1	0
1	1	1	1	0	0	1	1	0	1	0
0	1	1	1	1	0	1	1	0	1	0
1	1	0	1	1	0	0	1	0	1	0
1	1	0	1	1	1	1	1	0	1	0
1	1	0	1	0	1	1	1	0	1	0
0	0	1	0	0	1	1	1	0	1	0
1	1	1	1	1	1	0	0	0	0	0
1	0	0	1	1	1	0	0	0	0	0
1	0	1	1	0	1	0	0	0	0	0
1	1	1	1	0	1	0	1	1	0	0
0	1	1	1	1	1	0	0	1	0	0
1	0	0	1	1	1	0	0	1	0	0
1	1	0	1	1	1	0	0	1	0	0
1	1	0	1	1	1	0	0	1	0	0
0	1	1	1	1	1	0	0	1	0	0
1	0	0	1	1	1	0	0	1	0	0
1	0	0	1	1	1	0	0	1	0	0
1	1	0	1	1	1	0	0	1	0	0
1	1	0	1	1	1	0	0	1	0	0
1	0	1	1	1	1	0	0	1	0	0
1	1	1	1	1	1	0	0	1	0	0
0	0	0	1	1	1	0	0	0	0	0
1	1	1	1	1	1	1	0	0	0	0
1	0	1	1	1	1	1	0	0	0	0
0	0	0	1	1	1	0	0	0	0	0
1	1	0	1	1	1	0	0	0	0	0
1	0	1	1	0	1	0	0	0	0	0
1	0	1	1	1	1	0	0	0	0	0
0	1	0	1	1	0	1	1	0	0	0
1	0	1	0	0	1	0	0	0	0	1
0	1	0	1	1	0	1	0	0	0	1
1	0	0	1	1	1	1	0	0	0	1
0	1	1	1	1	1	0	0	0	1	1
1	0	0	1	0	1	0	0	1	0	1
1	0	1	1	1	1	0	1	1	0	1
